# Supplementary material for: Circadian KaiC Phosphorylation: A Multi-Layer Network
Source: PLOS journal article supplement (doi:10.1371/journal.pcbi.1000568), 2009-11-19
Supplement: S2 (10.1371/journal.pcbi.1000568.s002) [file journal.pcbi.1000568.s002]

Table S1: Expressions and descriptions for reaction flows (*J*)

| flow                                                                                              | expression                                                | explanation                                                                           |
|---------------------------------------------------------------------------------------------------|-----------------------------------------------------------|---------------------------------------------------------------------------------------|
| $Japt_s^t$                                                                                        | $kapt_s^t[AC_s^t]$                                        | KaiAC ( $AC_s^t$ ) phosphorylation at T432                                            |
| $Japs_s^t$                                                                                        | $kaps_s^t[AC_s^t]$                                        | KaiAC ( $AC_s^t$ ) phosphorylation at S431                                            |
| $Jdpt_s^t$                                                                                        | $kdpt_s^t[C_s^t]$                                         | KaiC ( $C_s^t$ ) dephosphorylation at T432                                            |
| $Jdps_s^t$                                                                                        | $kdps_s^t[C_s^t]$                                         | KaiC ( $C_s^t$ ) dephosphorylation at S431                                            |
| $Jbdpt_s^t$                                                                                       | $kbdpt_s^t[B_2C_s^t]$                                     | KaiBC ( $B_2C_s^t$ ) dephosphorylation at T432                                        |
| $Jbdps_s^t$                                                                                       | $kbdps_s^t[B_2C_s^t]$                                     | KaiBC ( $B_2C_s^t$ ) dephosphorylation at S431                                        |
| $Jabpt_s^t$                                                                                       | $kabpt_s^t([AB_2C_s^t] + [A_2B_2C_s^t] + [A_3B_2C_s^t])$  | KaiABC ( $AB_2C_s^t$ , $A_2B_2C_s^t$ and $A_3B_2C_s^t$ )<br>phosphorylation at T432   |
| $Jabps_s^t$                                                                                       | $kabps_s^t([AB_2C_s^t] + [A_2B_2C_s^t] + [A_3B_2C_s^t])$  | KaiABC ( $AB_2C_s^t$ , $A_2B_2C_s^t$ and $A_3B_2C_s^t$ )<br>phosphorylation at S431   |
| $Jabdpt_s^t$                                                                                      | $kabdpt_s^t([AB_2C_s^t] + [A_2B_2C_s^t] + [A_3B_2C_s^t])$ | KaiABC ( $AB_2C_s^t$ , $A_2B_2C_s^t$ and $A_3B_2C_s^t$ )<br>dephosphorylation at T432 |
| $Jabdps_s^t$                                                                                      | $kabdps_s^t([AB_2C_s^t] + [A_2B_2C_s^t] + [A_3B_2C_s^t])$ | KaiABC ( $AB_2C_s^t$ , $A_2B_2C_s^t$ and $A_3B_2C_s^t$ )<br>dephosphorylation at S431 |
| Descriptions of rate constants for KaiC (and Kai complexes) phosphorylation and dephosphorylation |                                                           |                                                                                       |
| rate constants                                                                                    | description                                               |                                                                                       |
| $kapt_s^t$                                                                                        | KaiAC ( $AC_s^t$ ) phosphorylation at T432                |                                                                                       |
| $kaps_s^t$                                                                                        | KaiAC ( $AC_s^t$ ) phosphorylation at S431                |                                                                                       |

|              |                                                                                    |
|--------------|------------------------------------------------------------------------------------|
| $kdpt_s^t$   | KaiC ( $C_s^t$ ) dephosphorylation at T432                                         |
| $kdps_s^t$   | KaiC ( $C_s^t$ ) dephosphorylation at S431                                         |
| $kbdpt_s^t$  | KaiBC ( $B_2C_s^t$ ) dephosphorylation at T432                                     |
| $kbdps_s^t$  | KaiBC ( $B_2C_s^t$ ) dephosphorylation at S431                                     |
| $kabpt_s^t$  | KaiABC ( $AB_2C_s^t$ , $A_2B_2C_s^t$ and $A_3B_2C_s^t$ ) phosphorylation at T432   |
| $kabps_s^t$  | KaiABC ( $AB_2C_s^t$ , $A_2B_2C_s^t$ and $A_3B_2C_s^t$ ) phosphorylation at S431   |
| $kabdpt_s^t$ | KaiABC ( $AB_2C_s^t$ , $A_2B_2C_s^t$ and $A_3B_2C_s^t$ ) dephosphorylation at T432 |
| $kabdps_s^t$ | KaiABC ( $AB_2C_s^t$ , $A_2B_2C_s^t$ and $A_3B_2C_s^t$ ) dephosphorylation at S431 |
